# Supplementary material
Source: PubMed Central journal article supplement (PMC3156264)

# Supplemental Figure 1.

A.

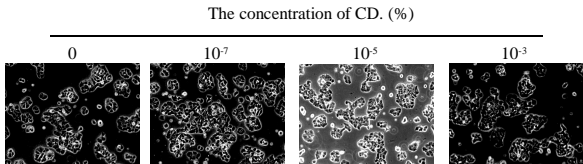

B.

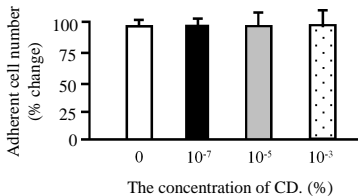

Supplement: 12192_2011_265_MOESM1_ESM.pdf [file 12192_2011_265_MOESM1_ESM.pdf]
